# Supplementary material for: Did Expanded Dental Insurance Reduce Out-of-Pocket Expenditures on Dental Care among Older Adults in Korea? Interrupted Time-Series Analysis
Source: PubMed Central journal article supplement (PMC7999161; doi:10.3390/ijerph18063003), 2021-03-15
Supplement: ijerph-18-03003-s001.pdf [file ijerph-18-03003-s001.pdf]

## Supplementary materials

Figure S1. Sample selection flow chart.

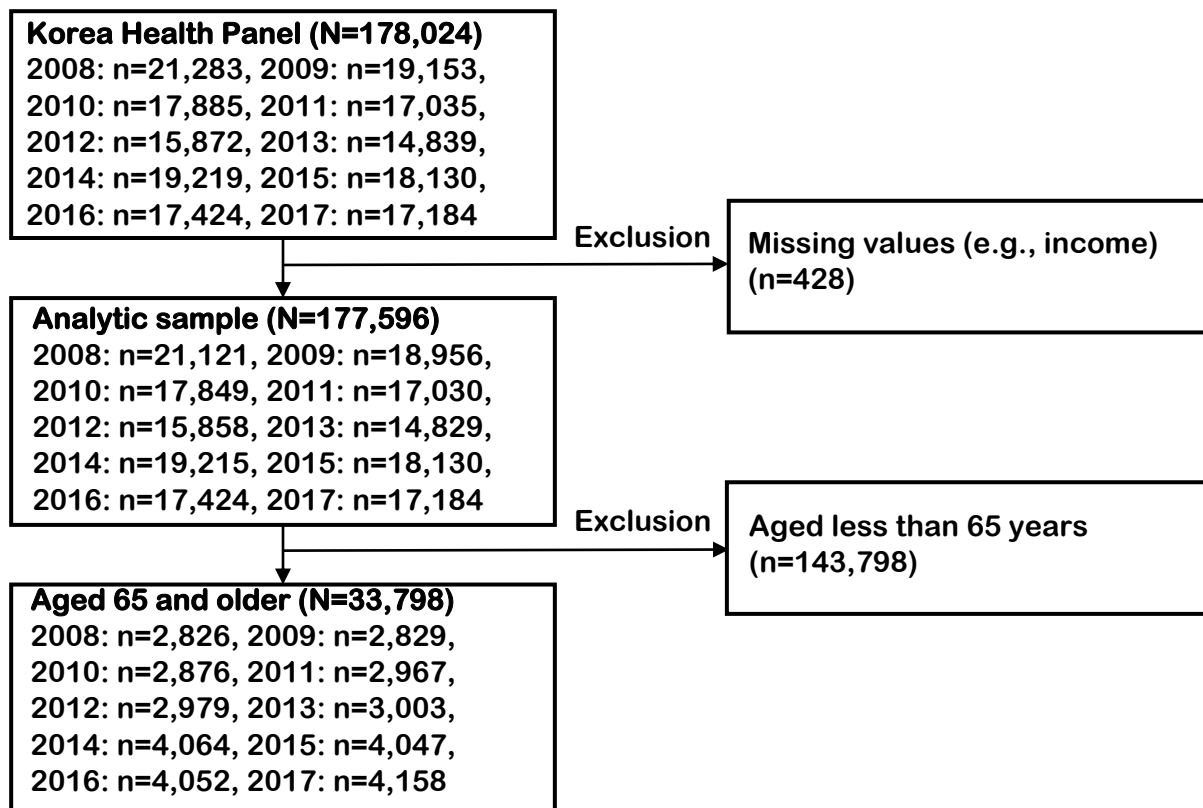

Figure S2. Dental expenditure for older adults in South Korea, 2008-2018

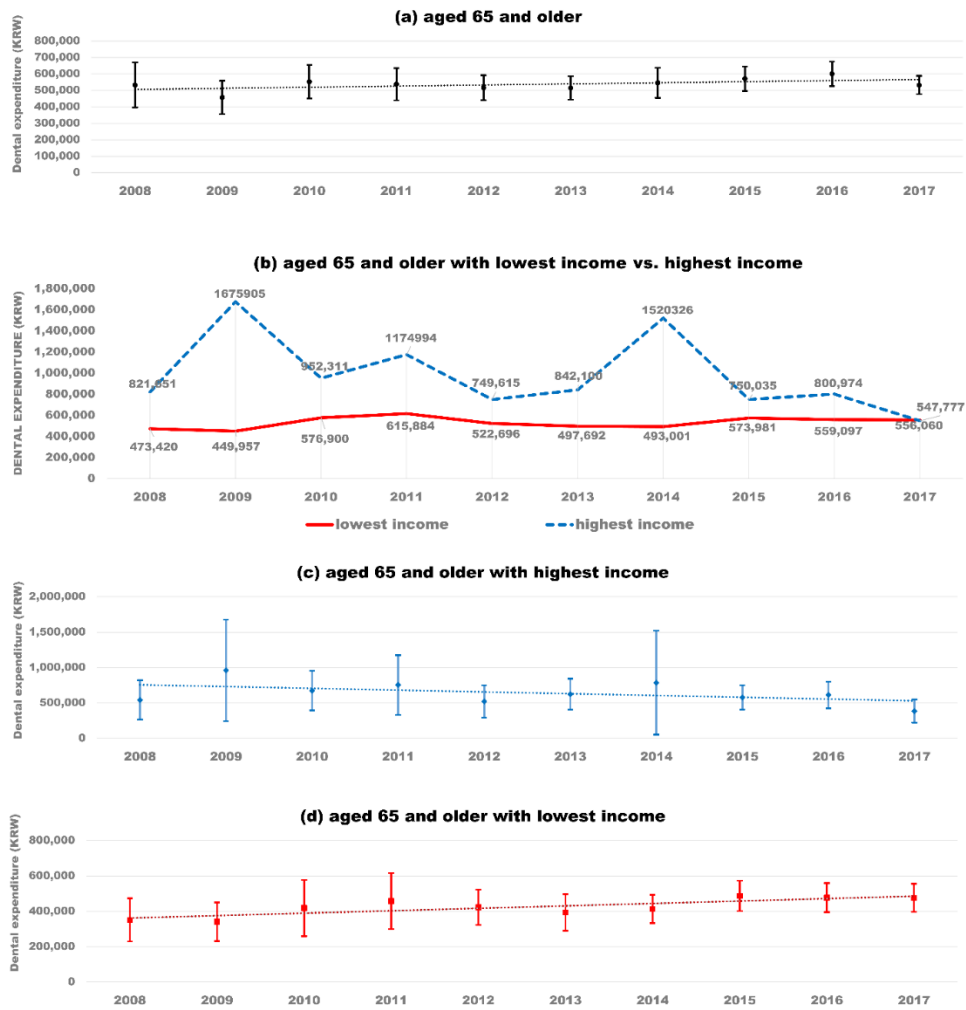

**Table S1.** Lincom estimates for the multi-group comparison.

| Measure of interest                                                         | Model parameter                         | 2011 <sup>b</sup> |         |                     |
|-----------------------------------------------------------------------------|-----------------------------------------|-------------------|---------|---------------------|
|                                                                             |                                         | Point estimate    | P-value | 95% CI              |
| <b>Between-group comparison<sup>a</sup></b>                                 |                                         |                   |         |                     |
| Pre-intervention trend: control                                             | $\beta_1$                               | 65,322            | 0.55    | -167,259 to 297,903 |
| Pre-intervention trend: treatment                                           | $\beta_5 + \beta_1$                     | 33,460            | 0.03    | 4,202 to 62,718     |
| Difference pre-intervention: treatment versus control                       | $\beta_5$                               | -31,863           | 0.77    | -266,277 to 202,552 |
| Difference immediately following the intervention: treatment versus control | $\beta_6$                               | 126,126           | 0.62    | -419,535 to 671,786 |
| Post-intervention trend: control                                            | $\beta_1 + \beta_3$                     | -34,700           | 0.10    | -77,400 to 8,143    |
| Post-intervention trend: treatment                                          | $\beta_1 + \beta_3 + \beta_5 + \beta_7$ | 9,280             | 0.15    | -3,800 to 22,400    |
| Difference post-intervention: treatment versus control                      | $\beta_5 + \beta_7$                     | 43,900            | 0.05    | -819 to 88,700      |
| Difference pre- versus post-intervention: control                           | $\beta_3$                               | -99,974           | 0.37    | 332,115 to 132,168  |
| Difference pre- versus post-intervention: treatment                         | $\beta_3 + \beta_7$                     | 24,180            | 0.17    | 59,779 to 11,420    |
| Difference pre- versus post-intervention: treatment versus control          | $\beta_7$                               | 75,794            | 0.50    | -159,061 to 310,650 |

<sup>a</sup> aged 65 years and older with lowest income (treatment) vs. highest income (control).

<sup>b</sup> pre-intervention vs. post-intervention with placebo start in 2011 year.

**Table S2.** Cumby-Huizinga test for autocorrelation.

| lags       | Chi <sup>2</sup> | df       | p-value       | lag      | Ch <sup>2</sup> | dh       | p-value       |
|------------|------------------|----------|---------------|----------|-----------------|----------|---------------|
| <b>1-1</b> | <b>5.199</b>     | <b>1</b> | <b>0.0226</b> | <b>1</b> | <b>5.199</b>    | <b>1</b> | <b>0.0226</b> |
| 1-2        | 6.961            | 2        | 0.0308        | 2        | 3.665           | 1        | 0.0556        |
| 1-3        | 6.962            | 3        | 0.0731        | 3        | 0.997           | 1        | 0.3179        |
| 1-4        | 7.09             | 4        | 0.1312        | 4        | 0.937           | 1        | 0.333         |

actest, lags (4)

\* Eigenvalues adjusted to ensure a positive semidefinite matrix

H0: variable is MA process up to order q

HA: serial correlation present at specified lags >q

Test allows predetermined regressors/instruments

Test requires conditional homoscedasticity

H0: q = 0 (serially uncorrelated) | H0: q = specified lag-1

HA: s.c. present at range specified | HA: s.c. present at lag specified
